# Supplementary material for: Modulation of 2-imino-6,7-dihydroquinlin-8(5H)-imine-iron ethylene polymerization catalysts through (cyclo)alkyl, benzhydryl and halide substitution
Source: Royal Society of Chemistry journal article supplement (doi:10.1039/d5ra06630a), 2025-01-01
Supplement: d5ra06630a1.pdf [file d5ra06630a1.pdf]

## Modulation of 2-imino-6,7-dihydroquinlin-8(5H)-imine-iron ethylene polymerization catalysts through (cyclo)alkyl, benzhydryl and halide substitution

Randi Zhang,<sup>a,b</sup> Yanping Ma,<sup>b</sup> Gregory A. Solan,<sup>\*b,c</sup> Yizhou Wang,<sup>b</sup> Jiahao Gao,<sup>b</sup> Tongling

Liang,<sup>b</sup> Wen-Hua Sun<sup>\*b</sup>

<sup>a</sup> SINOPEC (Beijing) Research Institute of Chemical Industry Co., Ltd., No. 14 Beisanhuan Donglu, Chao Yang District, Beijing 100013, China. Email: [zhangrd.bjhy@sinopec.com](mailto:zhangrd.bjhy@sinopec.com)

<sup>b</sup> Key Laboratory of Engineering Plastics and Beijing National Laboratory for Molecular Sciences, Institute of Chemistry, Chinese Academy of Sciences, Beijing 100190, China. E-mail: [whsun@iccas.ac.cn](mailto:whsun@iccas.ac.cn). Tel: +86-10-62557955.

<sup>c</sup> Department of Chemistry, University of Leicester, University Road, Leicester LE1 7RH, UK. E-mail: [gas8@leicester.ac.uk](mailto:gas8@leicester.ac.uk). Tel: +44-116 2522096

### Table of Contents

|    |                                                                            |    |
|----|----------------------------------------------------------------------------|----|
| 1. | Additional catalytic data and polymer data from runs using <b>Fe5</b> /MAO | S2 |
| 2. | Additional <sup>1</sup> H and <sup>13</sup> C NMR data for the polymers    | S2 |
| 3. | Proposed mechanistic pathways for polymer formation                        | S5 |
| 4. | Crystallographic data                                                      | S5 |
| 5. | References                                                                 | S6 |

## 1. Additional catalytic data and polymer data from runs using Fe5/MAO

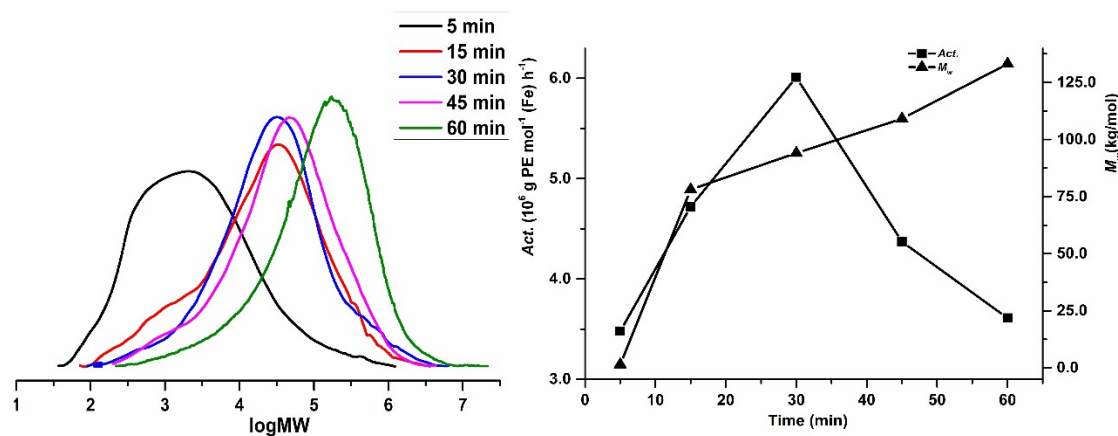

**Figure S1.** For Fe5/MAO: (a) GPC traces showing  $\log M_w$  as a function of reaction time (entries 8, 11 – 14, Table 3) and (b) plots of catalytic activity and  $M_w$  of the polymer versus reaction time.

## 2. Additional $^1\text{H}$ and $^{13}\text{C}$ NMR data for the polymers

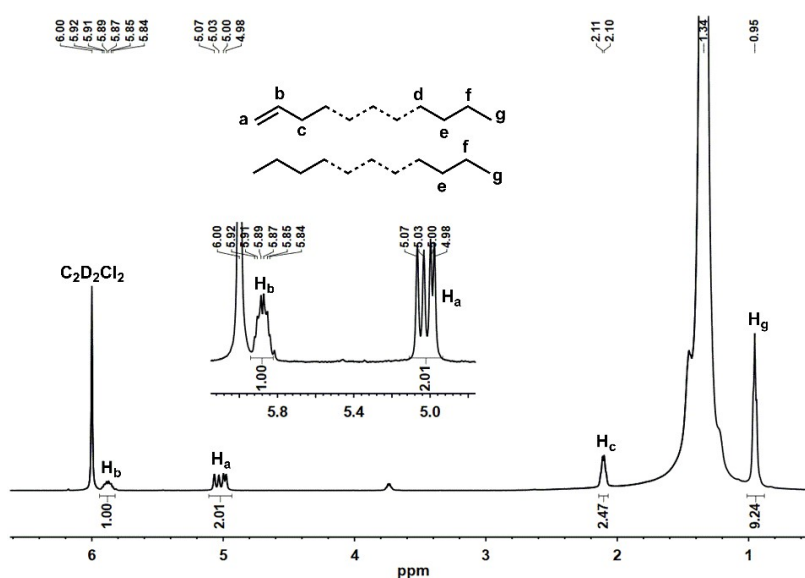

**Figure S2.**  $^1\text{H}$  NMR spectrum of the polyethylene obtained using Fe7/MAO at 40 °C including an expansion of the vinylic region (entry 16, Table 4); recorded in tetrachloroethane- $d_2$  at 100 °C

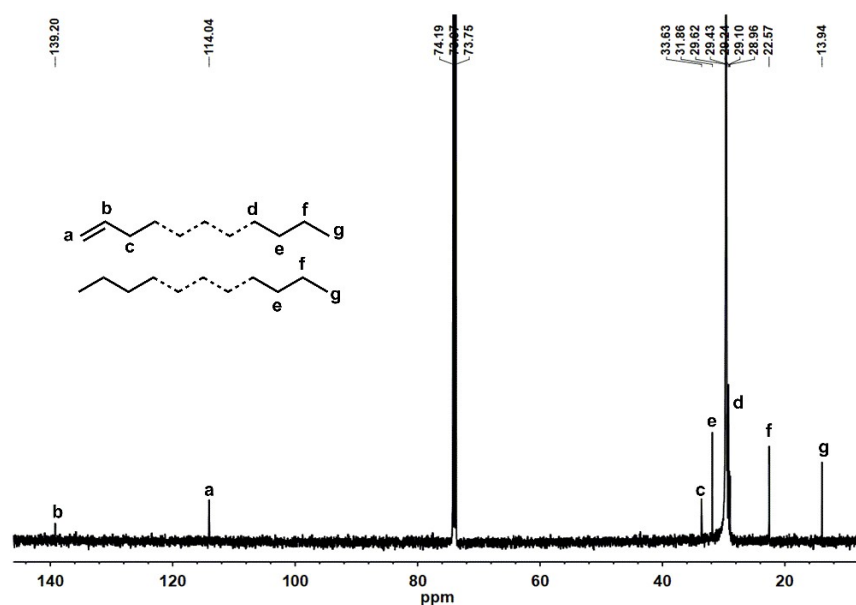

**Figure S3.**  $^{13}\text{C}$  NMR spectrum of the polyethylene obtained using **Fe7**/MAO at 40 °C (entry 16, Table 4); recorded in tetrachloroethane- $d_2$  at 100 °C

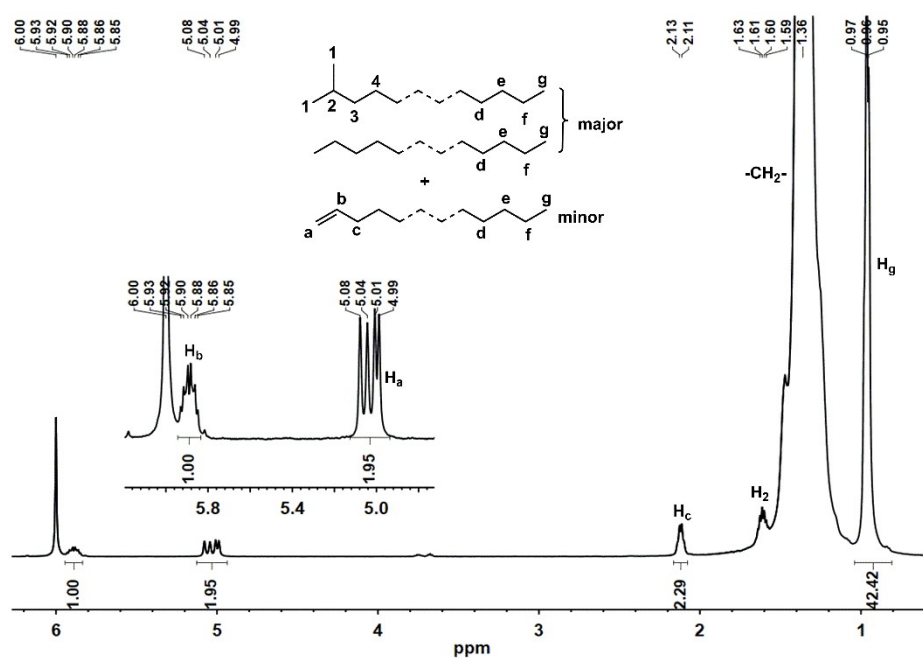

**Figure S4.**  $^1\text{H}$  NMR spectrum of the polyethylene obtained using **Fe4**/MMAO at 60 °C (entry 4, Table 4); recorded in tetrachloroethane- $d_2$  at 100 °C

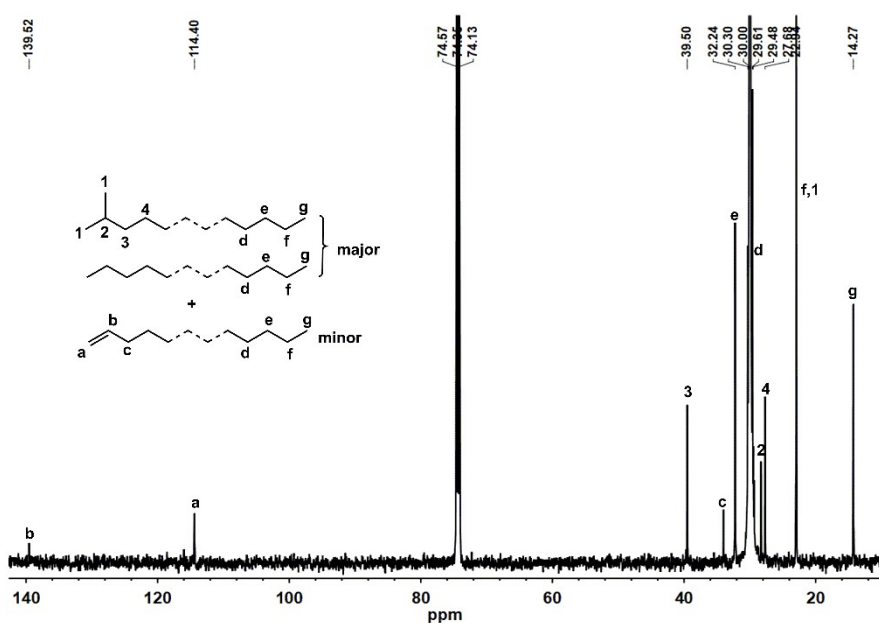

**Figure S5.**  $^{13}\text{C}$  NMR spectrum of the polyethylene obtained using **Fe4**/MMAO at 60 °C (entry 4, Table 4); recorded in tetrachloroethane- $d_2$  at 100 °C

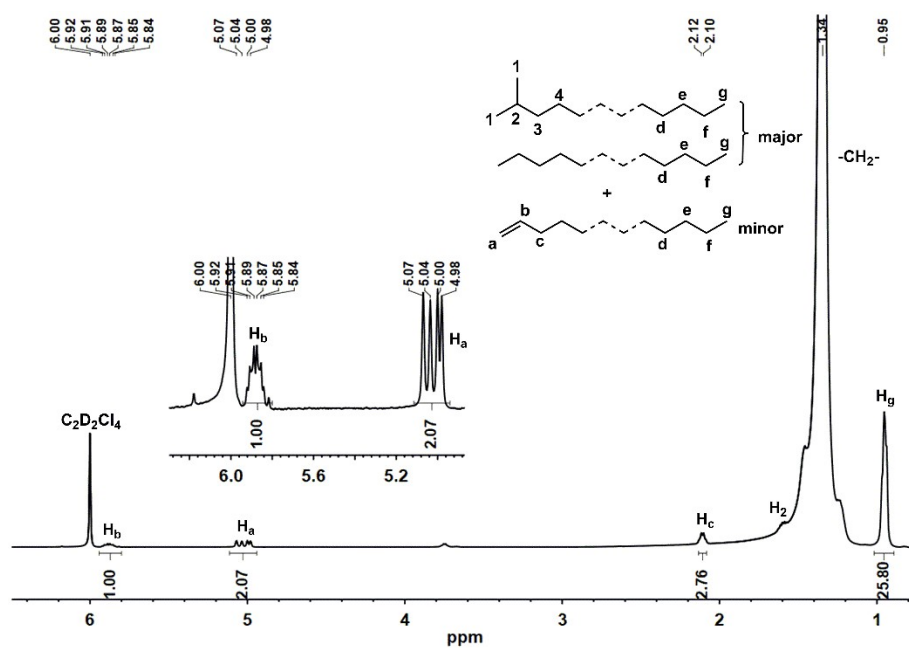

**Figure S6.**  $^1\text{H}$  NMR spectrum of the polyethylene obtained using **Fe5**/MMAO at 60 °C including an expansion of the vinylic region (entry 5, Table 4); recorded in tetrachloroethane- $d_2$  at 100 °C

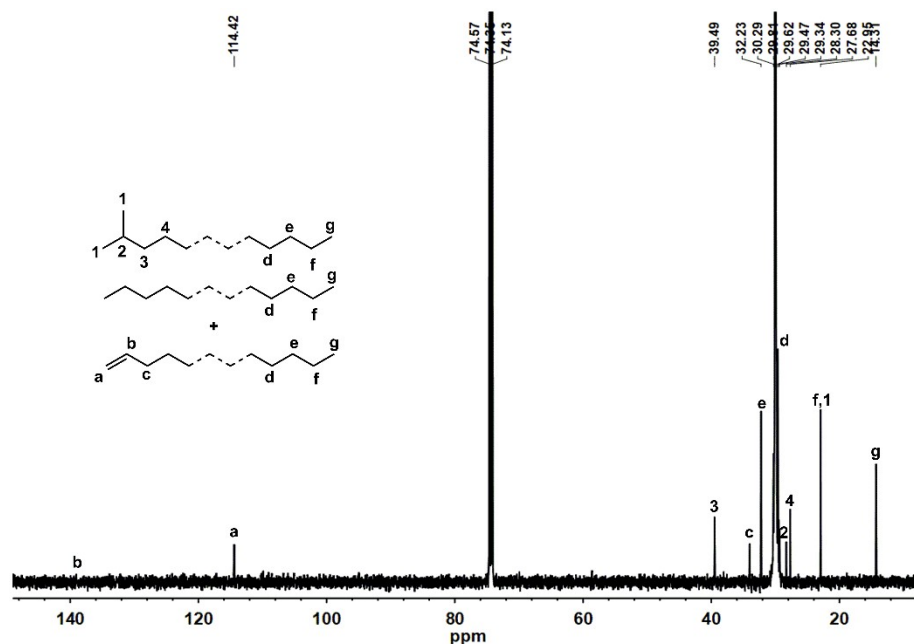

**Figure S7.**  $^{13}\text{C}$  NMR spectrum of the polyethylene obtained using **Fe5**/MMAO at 60 °C (entry 5, Table 4); recorded in tetrachloroethane- $d_2$  at 100 °C

### 3. Proposed mechanistic pathways for polymer formation

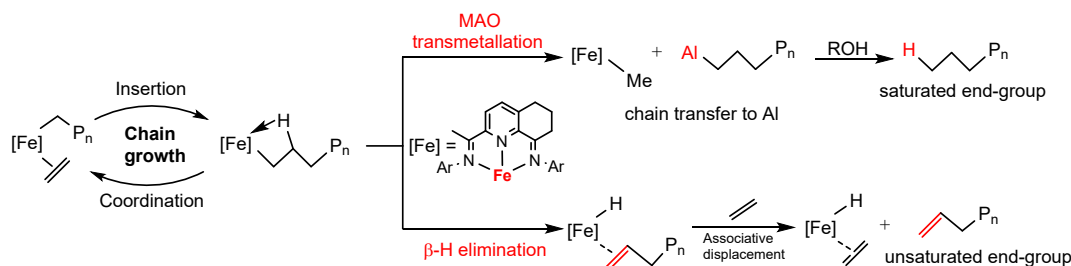

**Figure S8.** Proposed mechanistic pathways to account for the different polymer end groups generated by the iron catalysts.<sup>1-4</sup>

### 4. Crystallographic data

Single crystals of **Fe3** and **Fe5** suitable for the X-ray determinations were obtained by layering heptane onto a dichloromethane solution of the corresponding complex at room temperature. With graphite monochromated Cu-K $\alpha$  radiation ( $\lambda = 1.54184 \text{ \AA}$ ) at 170(2) K, cell parameters were obtained by global refinement of the positions of all collected reflections. The data were corrected for Lorentz and polarization effects (SAINT) and semiempirical absorption corrections based on equivalent reflections were applied (SADABS). Using Olex2,<sup>4</sup> the structure was solved with the SHELXT structure solution program<sup>5</sup> using Intrinsic Phasing and refined with the SHELXL refinement package<sup>6</sup> using Least Squares minimization. All hydrogen atoms were placed in calculated positions. Details of the X-ray structure determinations and refinements are provided in Table S1.

**Table S1** Crystal data and structural refinements for **Fe3** and **Fe5**

|                                                        | <b>Fe3</b>                                                                                              | <b>Fe5</b>                                                       |
|--------------------------------------------------------|---------------------------------------------------------------------------------------------------------|------------------------------------------------------------------|
| CCDC number                                            | 2482813                                                                                                 | 2482814                                                          |
| Empirical formula                                      | C <sub>63</sub> H <sub>64</sub> Cl <sub>6</sub> FeN <sub>3</sub>                                        | C <sub>87</sub> H <sub>81</sub> Cl <sub>2</sub> FeN <sub>3</sub> |
| Formula weight                                         | 1131.72                                                                                                 | 1295.29                                                          |
| Temperature/K                                          | 169.99(14)                                                                                              | 170.00(16)                                                       |
| Wavelength/Å                                           | 1.54184                                                                                                 | 1.54184                                                          |
| Crystal system                                         | triclinic                                                                                               | monoclinic                                                       |
| Space group                                            | P-1                                                                                                     | P2 <sub>1</sub> /c                                               |
| <i>a</i> /Å                                            | 9.3002(4)                                                                                               | 28.2417(18)                                                      |
| <i>b</i> /Å                                            | 13.7002(6)                                                                                              | 17.0632(12)                                                      |
| <i>c</i> /Å                                            | 22.4970(7)                                                                                              | 17.8586(12)                                                      |
| Alpha/°                                                | 96.212(3)                                                                                               | 90                                                               |
| Beta/°                                                 | 90.550(3)                                                                                               | 101.352(6)                                                       |
| Gamma/°                                                | 100.482(4)                                                                                              | 90                                                               |
| Volume/Å <sup>3</sup>                                  | 2800.8(2)                                                                                               | 8437.6(10)                                                       |
| <i>Z</i>                                               | 2                                                                                                       | 4                                                                |
| <i>D</i> <sub>calcd</sub> /(g/cm <sup>-3</sup> )       | 1.342                                                                                                   | 1.020                                                            |
| <i>μ</i> /mm <sup>-1</sup>                             | 5.117                                                                                                   | 2.317                                                            |
| <i>F</i> (000)                                         | 1182.0                                                                                                  | 2736.0                                                           |
| Crystal size/mm <sup>3</sup>                           | 0.15 × 0.1 × 0.05                                                                                       | 0.15 × 0.12 × 0.1                                                |
| 2θ range (°)                                           | 6.602 to 151.492                                                                                        | 6.084 to 152.98                                                  |
| Limiting indices                                       | -11 ≤ <i>h</i> ≤ 11, -15 ≤ <i>k</i> ≤ 17, -34 ≤ <i>h</i> ≤ 35, -20 ≤ <i>k</i> ≤ 21, -28 ≤ <i>l</i> ≤ 28 | 22 ≤ <i>l</i> ≤ 21                                               |
| No. of reflections collected                           | 36885                                                                                                   | 66083                                                            |
| No. unique reflections                                 | 11095                                                                                                   | 16933                                                            |
| <i>R</i> <sub>int</sub>                                | 0.0782                                                                                                  | 0.2270                                                           |
| No. of parameters                                      | 634                                                                                                     | 958                                                              |
| Completeness to θ                                      | 0.951                                                                                                   | 0.955                                                            |
| Goodness of fit on <i>F</i> <sup>2</sup>               | 1.062                                                                                                   | 0.931                                                            |
| Final <i>R</i> indexes<br>[ <i>I</i> ≥ 2σ( <i>I</i> )] | <i>R</i> <sub>1</sub> = 0.0908, <i>wR</i> <sub>2</sub> = 0.2673                                         | <i>R</i> <sub>1</sub> = 0.1060, <i>wR</i> <sub>2</sub> = 0.2488  |
| Final <i>R</i> indexes (all data)                      | <i>R</i> <sub>1</sub> = 0.1222, <i>wR</i> <sub>2</sub> = 0.2973                                         | <i>R</i> <sub>1</sub> = 0.1932, <i>wR</i> <sub>2</sub> = 0.3119  |
| Largest diff. peak and hole/(e Å <sup>-3</sup> )       | 1.42/-0.91                                                                                              | 0.72/-0.93                                                       |

#### 4. References

1. G. J. P. Britovsek, M. Bruce, V. C. Gibson, B. S. Kimberley, P. J. Maddox, S. Mastroianni, S. J. McTavish, C. Redshaw, G. A. Solan, S. Stromberg, A. J. P. White and D. J. Williams, *J. Am. Chem. Soc.*, 1999, **121**, 8728-8740.
2. Z. Wang, G. A. Solan, W. Zhang and W.-H. Sun, *Coord. Chem. Rev.*, 2018, **363**, 92-108.
3. V. C. Gibson and G. A. Solan, In *Catalysis without Precious Metals*; Bullock, R.M., Ed.; Wiley-VCH: Weinheim, Germany, 2010; pp. 111-141.
4. Y. Yuan, Z. Yan and S. Dai, *Inorg. Chem.*, 2025, **64**, 3384-3391.

5. O. V. Dolomanov, L. J. Bourhis, R. J. Gildea, J. A. K. Howard and H. Puschmann, *J. Appl. Cryst.*, 2009, **42**, 339-341.
6. G. M. Sheldrick, *Acta Crystallogr.*, 2015, A71, 3.
7. G. M. Sheldrick, 2015, C71, 3.
